# Supplementary material for: Photobiocatalytic H2 evolution of GaN:ZnO and [FeFe]-hydrogenase recombinant Escherichia coli
Source: Royal Society of Chemistry journal article supplement (doi:10.1039/d0cy00128g), 2020-01-01
Supplement: d0cy00128g1.pdf [file d0cy00128g1.pdf]

## Supplementary information

### Photobiocatalytic H<sub>2</sub> evolution of GaN:ZnO and [FeFe]- hydrogenase recombinant *Escherichia coli*

Nuttavut Kosem<sup>a,b,\*</sup>, Yuki Honda<sup>c</sup>, Motonori Watanabe<sup>a</sup>, Atsushi Takagaki<sup>b</sup>,  
Zahra Pourmand Tehrani<sup>d</sup>, Fatima Haydous<sup>d</sup>, Thomas Lippert<sup>a,d,e</sup>, Tatsumi Ishihara<sup>a,b</sup>

<sup>a</sup> *International Institute for Carbon-Neutral Energy Research (I<sup>2</sup>CNER), Kyushu University, 744  
Motooka, Nishi-ku, Fukuoka 819-0395, Japan*

<sup>b</sup> *Department of Applied Chemistry, Faculty of Engineering, Kyushu University, 744 Motooka,  
Nishi-ku, Fukuoka 819-0395, Japan*

<sup>c</sup> *Department of Chemistry, Biology and Environmental Science, Faculty of Science, Nara  
Women's University, Kita-uoyanishi-machi, Nara 630-8506, Japan*

<sup>d</sup> *Laboratory of Inorganic Chemistry, Department of Chemistry and Applied Biosciences, ETH  
Zürich, CH-8093, Zürich, Switzerland*

<sup>e</sup> *Laboratory for Multiscale Materials Experiments, Paul Scherrer Institut, Forschungsstrasse  
111, CH-5232 Villigen PSI, Switzerland*

\*E-mail of Corresponding author (N. Kosem)

kosem\_k@i2cner.kyushu-u.ac.jp

Tel: +81 92 802 6707

**Fig. S1** Spectral distribution of a 300-W xenon lamp (Model: CX-04E with an R300-3J lamp housing, INOTEX Co., LTD., Japan) was utilized as a full arc light source for the results in **Fig. 1**, **Fig. 4**, **Fig. 7** and **Fig. S2**. In addition, the results of **Fig. 8** under visible-light irradiation were obtained by using the xenon lamp equipped with a cut-off filter  $\lambda \geq 422$  nm (Model: LUO422, Asahi Spectra, Japan).

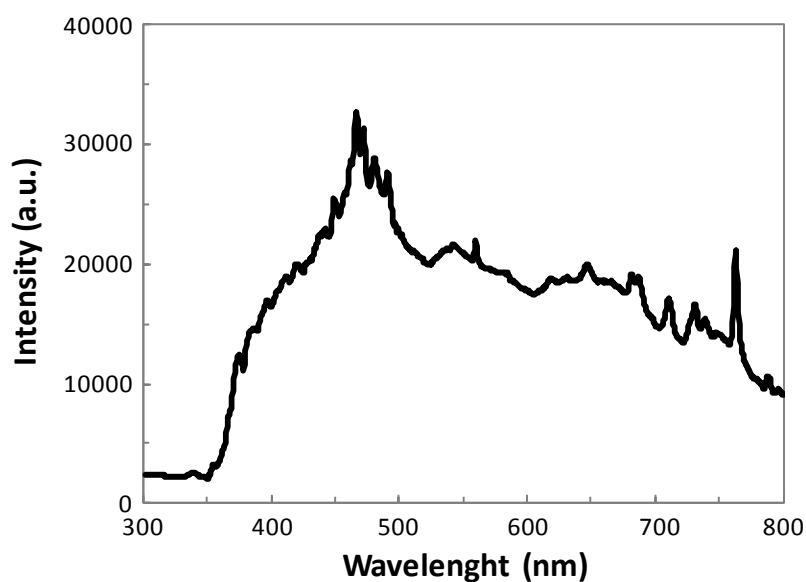

**Fig. S2** UV-Vis spectrum of photocatalytic reduced  $MV^{\bullet+}$  by different oxynitrides in the presence of 10% TEOA pH 8 and 5 mM methyl viologen ( $MV^{2+}$ ) irradiated by a full arc light source of  $1.7 \text{ W/cm}^2$  using a 300-W xenon lamp (CX-04E with an R300-3J lamp housing, INOTEX Co., LTD., Japan): A) TEOA+ $MV^{2+}$  only as a negative control, B)  $\text{LaTiO}_2\text{N}$ , C)  $\text{BaTaO}_2\text{N}$ , D)  $\text{Ta}_3\text{N}_5$  and E)  $\text{GaN:ZnO}$ . Amount of reduced  $MV^{\bullet+}$  was calculated from the absorbance at 605 nm using a molar conversion coefficient,  $\epsilon$ , of  $1.3 \times 10^4 \text{ M}^{-1}\cdot\text{cm}^{-1}$ . The analysed results were presented as shown in **Fig. 1A** (amount of reduced  $MV^{\bullet+}$  in a function of time) and **Fig. 1B** ( $MV^{2+}$  reduction rate).

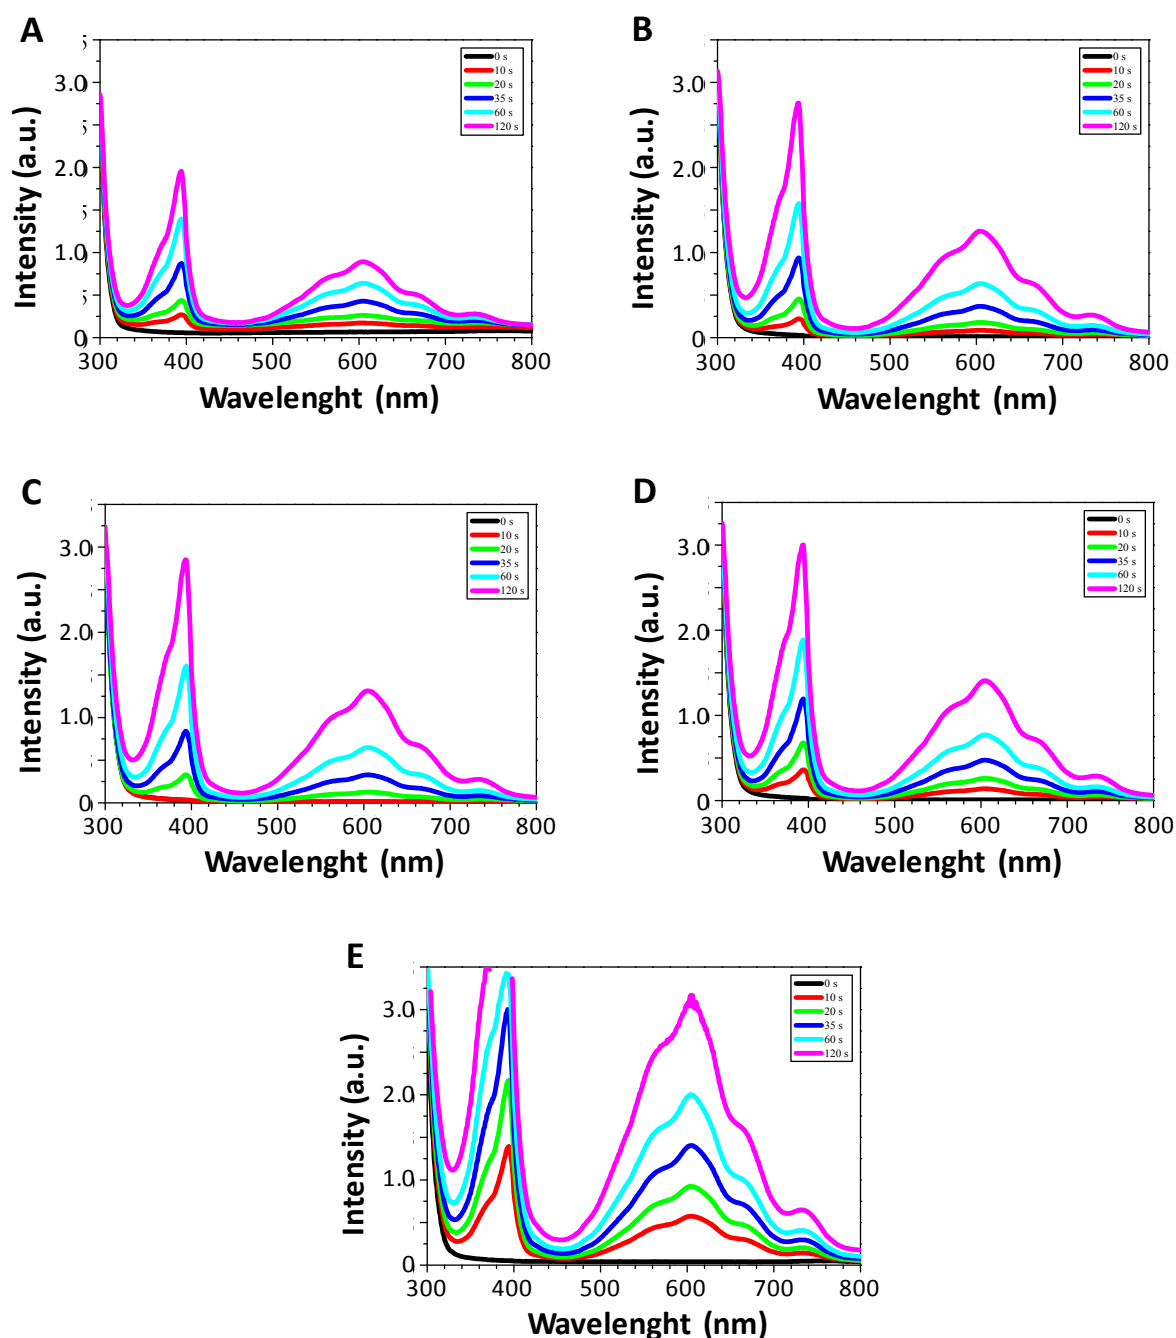

**Fig. S3** XRD patterns of A)  $\text{LaTiO}_2\text{N}$ , B)  $\text{BaTaO}_2\text{N}$ , C)  $\text{Ta}_3\text{N}_5$  and D)  $\text{GaN:ZnO}$  were performed using the powder diffraction method (RINT2500HLR+, Rigaku Corporation).

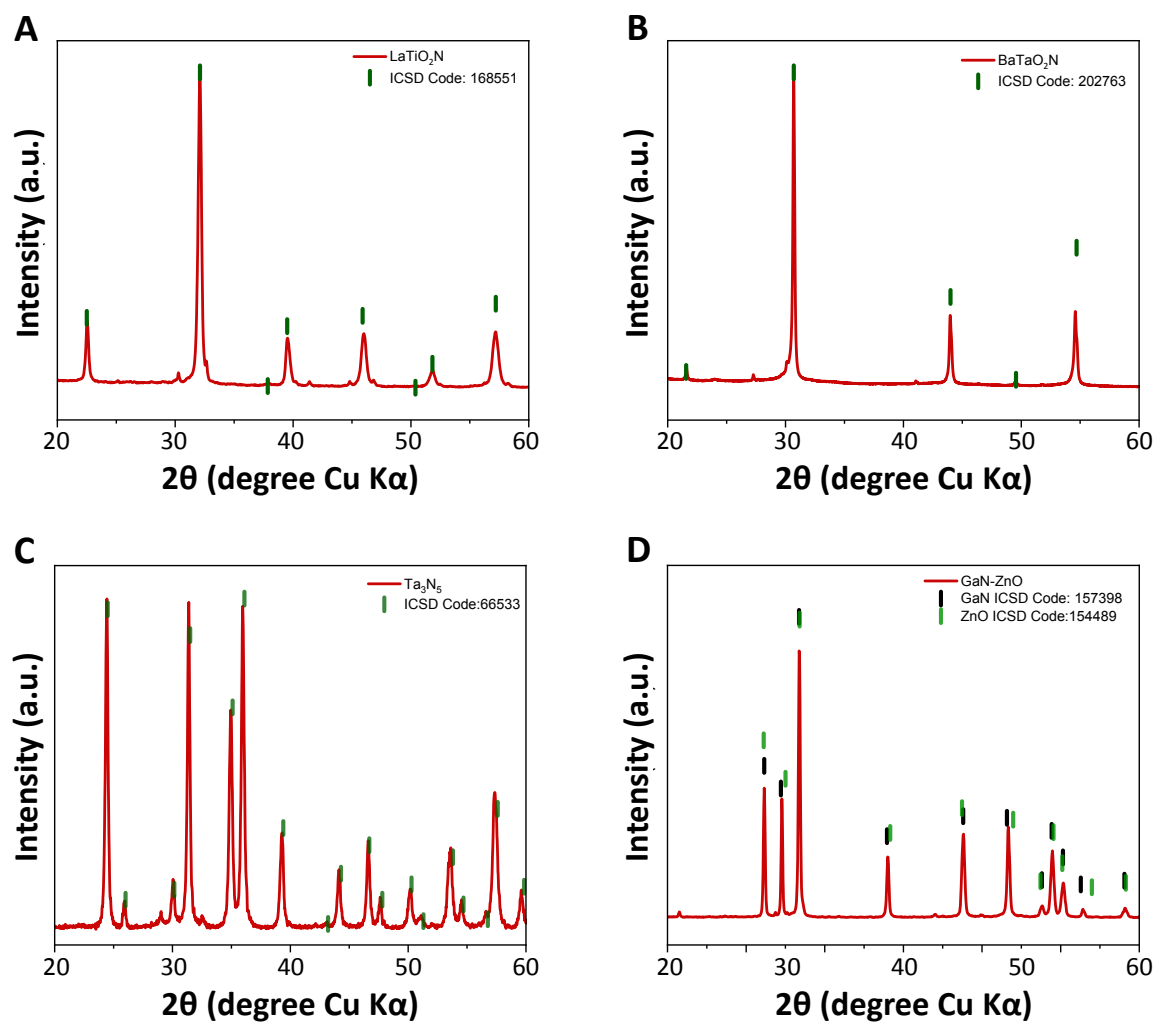

**Fig. S4** Strategies for [FeFe]-hydrogenase gene transformation from *C. acetobutylicum* into host cells *E. coli* BL21(DE3) (Hyd<sup>+</sup> *E. coli*). Recombinant cells were cultivated in selective LB medium including ampicillin (100 µg/mL) and streptomycin (40 µg/mL). After plasmid extraction process by illustra™ plasmidPrep Mini Spin Kit (GE Healthcare), 1% agarose gel electrophoresis confirms the presence of transformed plasmids for [FeFe]-hydrogenase expression as shown on the following Lane no.: 1) λ/Sty I digest Marker, 2) pEHydEA standard, 3) pCHydFG standard, and 4) both pEHydEA and pCHydFG plasmids extracted from Hyd<sup>+</sup> *E. coli*.

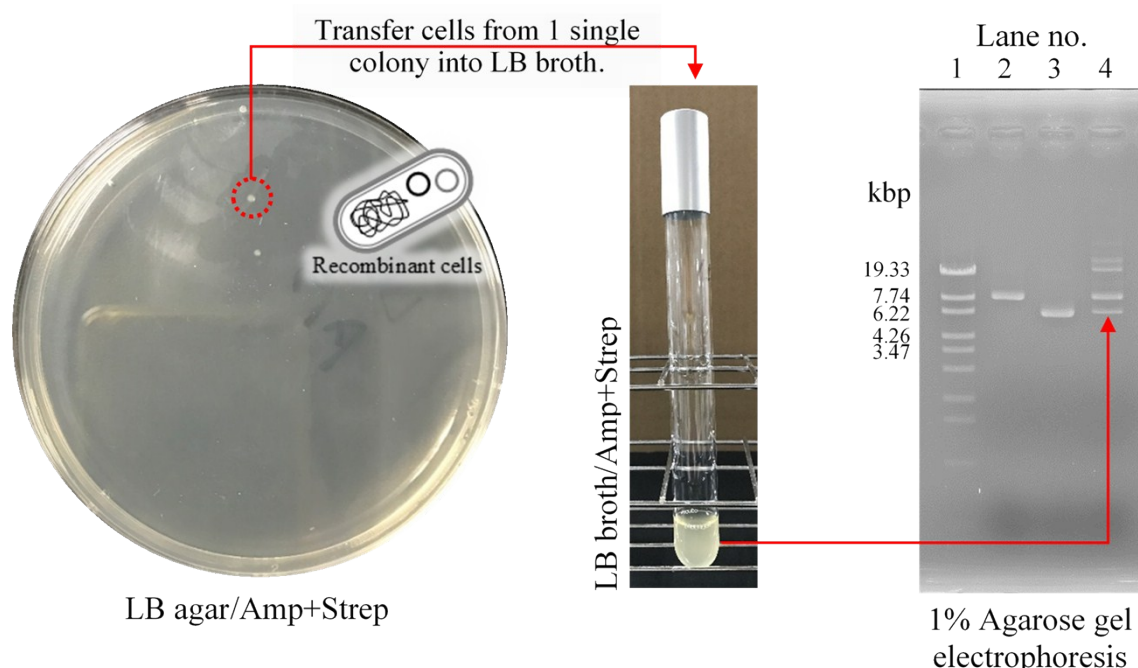

After co-transformation of pEHydEA and pCHydFG plasmids in host cells, Hyd<sup>+</sup> *E. coli* was cultivated and used as biocatalyst in the experiments as shown in **Fig. 6**, **Fig. 7** and **Fig. 8B**.

**Fig. S5** Cytotoxicity of each component on bacterial cell integrity: A) 10% (v/v) TEOA pH 8, B) 5 mg GaN:ZnO, C) 5 mM MV<sup>2+</sup>, D) Water and E) all components under light irradiation. Bacterial cell lysis was determined by  $\beta$ -galactosidase ( $\beta$ -gal) assay based on the activity of extracellular  $\beta$ -galactosidase released as an indicator of cell membrane damage.<sup>1</sup>

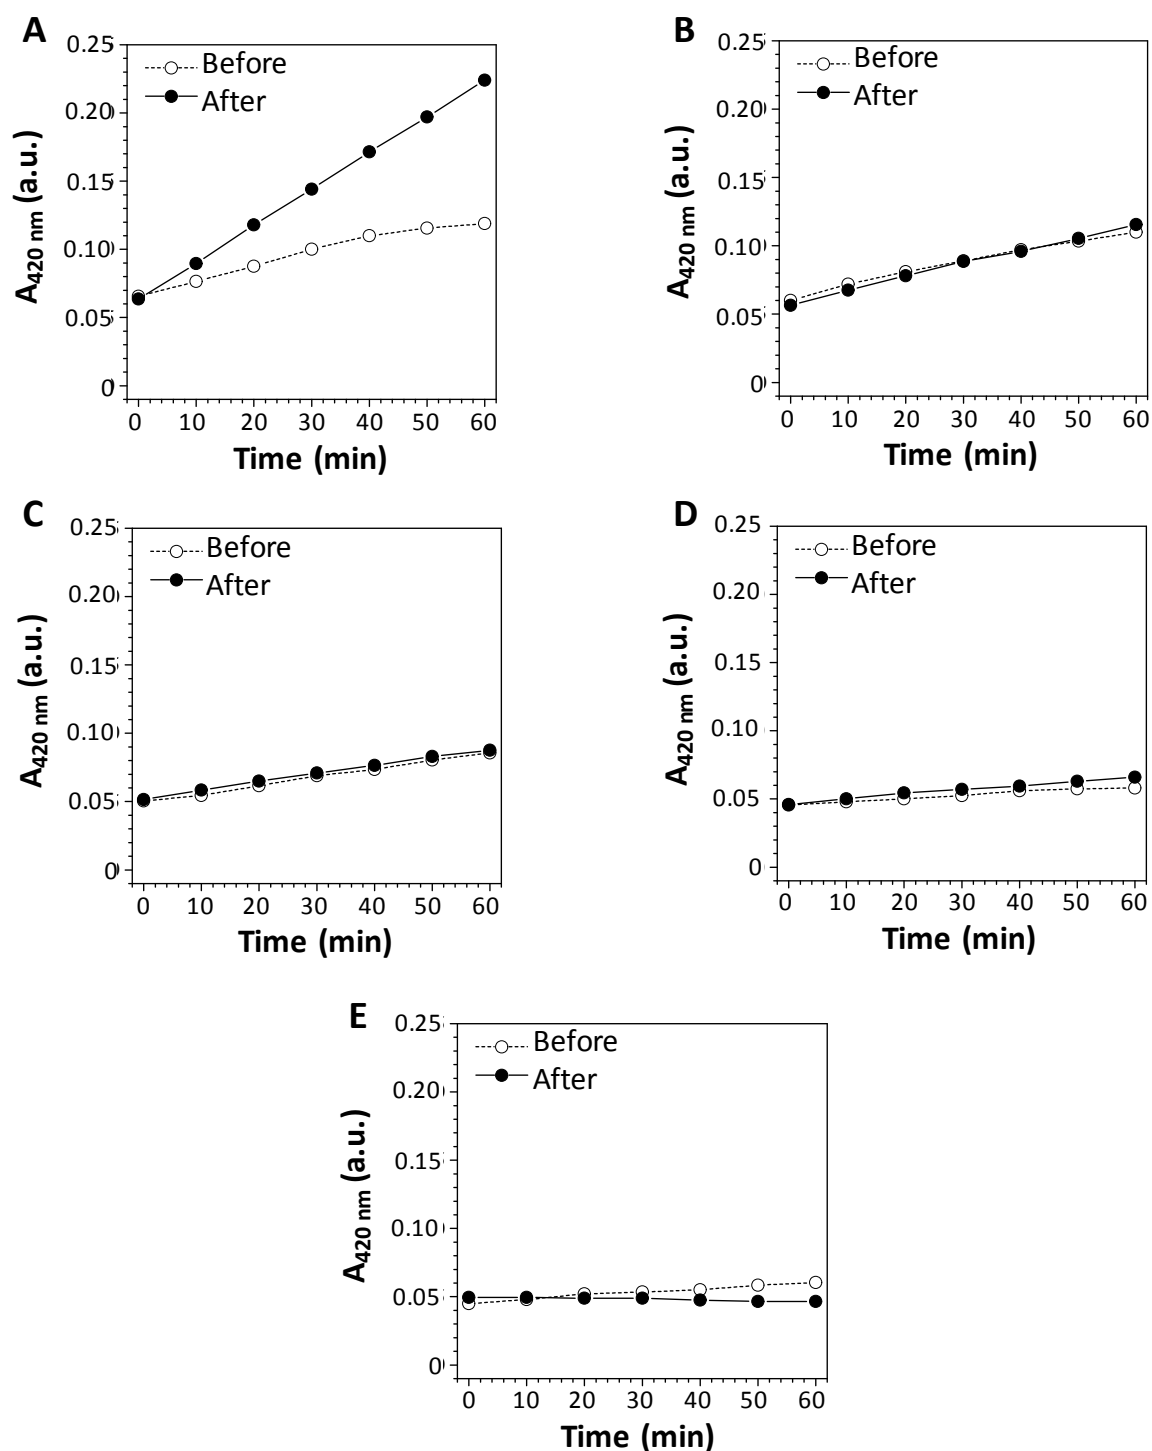

1. K. L. Griffith and R. E. Wolf, Jr., *Biochem. Biophys. Res. Commun.*, 2002, **290**, 397–402.

The influence of each component of the photobiocatalytic system on the bacterial cell integrity was determined by  $\beta$ -gal assay. The different components, GaN:ZnO (Fig. S5 B),  $MV^{2+}$  (Fig. S5 C), water (Fig. S5 D) and all components under irradiation (Fig. S5 E) have no effects on bacterial cells as evidenced by the same absorbance level detected before and after 1 h exposure. It was found that only 10% TEOA pH 8 (Fig. S5 A) showed an increase at the 420-nm absorbance determination after 1 h exposure indicating the release of  $\beta$ -galactosidase caused by cell membrane damage. However, the complete system of photobiocatalytic  $H_2$  production remains continued for up to 12 h as shown in **Fig. 7B**, indicating that [FeFe]-hydrogenase still functions efficiently. This finding highlights the effect of each component, including GaN:ZnO,  $MV^{2+}$  and water, on recombinant *E. coli*, in order to extend hydrogenase activity and improve  $H_2$  production efficiency for long-term experiments.

|                  |                           |                     |                                 |                           |                                       |                                             | Table<br>S1<br>Analysis<br>on the<br>rate of<br>inciden<br>t<br>photon<br>irradiat<br>ed<br>through<br>differen |
|------------------|---------------------------|---------------------|---------------------------------|---------------------------|---------------------------------------|---------------------------------------------|-----------------------------------------------------------------------------------------------------------------|
| Bandpass filters | Light power               | Area                | <sup>a</sup> $E_{\text{Total}}$ | <sup>b</sup> $E_p$        | <sup>c</sup> $N_p = E/E_p$            | <sup>d</sup> Rate of incident photon        |                                                                                                                 |
| 350 nm           | 0.0034 W.cm <sup>-2</sup> | 2.7 cm <sup>2</sup> | 0.0092 J.s <sup>-1</sup>        | $5.679 \times 10^{-19}$ J | $0.16 \times 10^{17}$ s <sup>-1</sup> | $0.0266 \times 10^{-6}$ mol.s <sup>-1</sup> |                                                                                                                 |
| 390 nm           | 0.0040 W.cm <sup>-2</sup> | 2.7 cm <sup>2</sup> | 0.0107 J.s <sup>-1</sup>        | $5.097 \times 10^{-19}$ J | $0.21 \times 10^{17}$ s <sup>-1</sup> | $0.0349 \times 10^{-6}$ mol.s <sup>-1</sup> |                                                                                                                 |
| 420 nm           | 0.0023 W.cm <sup>-2</sup> | 2.7 cm <sup>2</sup> | 0.0061 J.s <sup>-1</sup>        | $4.733 \times 10^{-19}$ J | $0.13 \times 10^{17}$ s <sup>-1</sup> | $0.0214 \times 10^{-6}$ mol.s <sup>-1</sup> |                                                                                                                 |
| 470 nm           | 0.0051 W.cm <sup>-2</sup> | 2.7 cm <sup>2</sup> | 0.0138 J.s <sup>-1</sup>        | $4.229 \times 10^{-19}$ J | $0.33 \times 10^{17}$ s <sup>-1</sup> | $0.0540 \times 10^{-6}$ mol.s <sup>-1</sup> |                                                                                                                 |
| 500 nm           | 0.0034 W.cm <sup>-2</sup> | 2.7 cm <sup>2</sup> | 0.0092 J.s <sup>-1</sup>        | $3.975 \times 10^{-19}$ J | $0.23 \times 10^{17}$ s <sup>-1</sup> | $0.0384 \times 10^{-6}$ mol.s <sup>-1</sup> |                                                                                                                 |

t band pass filters for AQY analysis.

<sup>a</sup>  $E_{\text{Total}}$  indicates the total energy of incident photon,  $E_{\text{Total}}$  (W or J s<sup>-1</sup>) = Power (W cm<sup>-2</sup>) × Area (cm<sup>2</sup>);



<sup>b</sup>  $E_p$  indicates the energy of one photon,  $E_p \text{ (J)} = hc/\lambda$ , where  $h$  is the Planks constant =  $6.63 \times 10^{-34} \text{ J s}$ ,  $c$  is the speed of light =  $2.998 \times 10^8 \text{ m s}^{-1}$  and  $\lambda$  is wavelength (m);

<sup>c</sup>  $N_p$  is the number of incident photon,  $N_p \text{ (s}^{-1}\text{)} = E_{\text{Total}} \text{ (J s}^{-1}\text{)} / E_p \text{ (J)}$ ;

<sup>d</sup> Rate of incident photon ( $\text{mol s}^{-1}$ ) =  $N_p / \text{Avogadro number} = N_p \text{ (s}^{-1}\text{)} / 6.022 \times 10^{23} \text{ mol}^{-1}$ .

**Table S2** MV<sup>2+</sup> reduction rate and apparent quantum yield (AQY) analysis of GaN:ZnO and P-

| Bandpass filters | GaN:ZnO                                    |                   | P-25                                        |                   |
|------------------|--------------------------------------------|-------------------|---------------------------------------------|-------------------|
|                  | Rate of MV reduction                       | <sup>a</sup> AQY% | Rate of MV reduction                        | <sup>a</sup> AQY% |
| 350 nm           | 0.5 × 10 <sup>-3</sup> mol s <sup>-1</sup> | <b>1.88 %</b>     | 12.0 × 10 <sup>-3</sup> mol s <sup>-1</sup> | <b>45.11 %</b>    |
| 390 nm           | 0.4 × 10 <sup>-3</sup> mol s <sup>-1</sup> | <b>1.15 %</b>     | 3.5 × 10 <sup>-3</sup> mol s <sup>-1</sup>  | <b>10.03 %</b>    |
| 420 nm           | 0.2 × 10 <sup>-3</sup> mol s <sup>-1</sup> | <b>0.93 %</b>     | 0.04 × 10 <sup>-3</sup> mol s <sup>-1</sup> | <b>0.19 %</b>     |
| 470 nm           | 0.2 × 10 <sup>-3</sup> mol s <sup>-1</sup> | <b>0.37 %</b>     | 0.02 × 10 <sup>-3</sup> mol s <sup>-1</sup> | <b>0.04 %</b>     |
| 500 nm           | 0.1 × 10 <sup>-3</sup> mol s <sup>-1</sup> | <b>0.26 %</b>     | 0.03 × 10 <sup>-3</sup> mol s <sup>-1</sup> | <b>0.08 %</b>     |

25.

$$^a \text{AQY\%} = 100 \times \frac{\text{Rate of reduced MV}\cdot + (\text{mol s}^{-1})}{\text{Rate of incident photons (mol s}^{-1})}$$

The results in Table S1 and S2 were obtained from the experiments under monochromatic light source of desired wavelengths and used to support data in **Fig. 5**. To avoid thermochromic effect, the reaction tubes were illuminated by using a heatless xenon lamp (MAX-303, Asahi Spectra) equipped with narrow bandpass filters (350, 390, 420, 470 and 500 nm) for AQY analysis.
